# Supplementary material
Source: PubMed Central journal article supplement (PMC1871839)
Supplement: pnas_0700930104_3.pdf [file pnas_0700930104_3.pdf]

**$^{15}\text{N}$  (PPM)**

116

118

120

122

124

126

128

130

**$^1\text{H}$  (PPM)**

7.2

7.6

8.0

8.4

8.8

7.2

7.6

8.0

8.4

8.8
