# Supplementary material
Source: PubMed Central journal article supplement (PMC1871839)
Supplement: pnas_0700930104_4.pdf [file pnas_0700930104_4.pdf]

**a****b**
