# Supplementary material
Source: PubMed Central journal article supplement (PMC1871839)
Supplement: pnas_0700930104_6.pdf [file pnas_0700930104_6.pdf]

## SI Appendix 2

### DNA Sequences

- 1) Computer generated random 59 base sequence, inserted into M13mp18 at insert position 6258

TATACGGGTACTAGCCATGCGTATACGGTCGCTAGCGGACTTGCCTCGCTATCAAAGGT

- 2) Deoxyribonucleotide sequences that were used to construct M13mp18 insert fragment

TCGAGCTCGGTACCCGGGGATCCTTATACG

CGCATGGCTAGTACCCGTATAAGGATCCCC

GGTACTAGCCATGCGTATACGGTCGCTAGC

TAGCGAGGCAAGTCCGCTAGCGACCGTATA

GGACTTGCCTCGCTATCAAAGGTCTAGAGT

CATGCCTGCAGGTCGACTCTAGACCTTTGA

- 3) Recombinant M13 filamentous bacteriophage genome sequence. This sequence serves as the input to all Python scripts in the form of a text file named "p7308.txt".

AATGCTACTACTATTAGTAGAATTGATGCCACCTTTTCAGCTCGCGCCCCAAATGAAAAT  
ATAGCTAAACAGGTTATTGACCATTTGCGAAATGTATCTAATGGTCAAACCTAAATCTACT  
CGTTCGCAGAATTGGGAATCAACTGTTATATGGAATGAACTTCCAGACACCGTACTTTA  
GTTGCATATTTAAAACATGTTGAGCTACAGCATTATATTCAGCAATTAAGCTCTAAGCCA  
TCCGCAAAAATGACCTCTTATCAAAGGAGCAATTAAAGGTACTCTCTAATCCTGACCTG  
TTGGAGTTTGCTTCCGGTCTGGTTCGCTTTGAAGCTCGAATTAACCGCGATATTTGAAG  
TCTTTCGGGCTTCTCTAATCTTTTTGATGCAATCCGCTTTGCTTCTGACTATAATAGT  
CAGGGTAAAGACCTGATTTTTGATTTATGGTCATTCTCGTTTTCTGAACTGTTTAAAGCA  
TTTGAGGGGGATTCAATGAATATTTATGACGATTCGCGAGTATTGGACGCTATCCAGTCT

AAACATTTTACTATTACCCCTCTGGCAAACTTCTTTTGCAAAGCCTCTCGCTATTTT  
GGTTTTTATCGTCGTCTGGTAAACGAGGGTTATGATAGTGTTGCTCTTACTATGCCTCGT  
AATTCCTTTTGGCGTTATGTATCTGCATTAGTTGAATGTGGTATTCTAAATCTCAACTG  
ATGAATCTTTCTACCTGTAATAATGTTGTTCCGTTAGTTTCGTTTTATTAACGTAGATTTT  
TCTTCCCAACGTCCTGACTGGTATAATGAGCCAGTTCTTAAAATCGCATAAGGTAATTCA  
CAATGATTAAAGTTGAAATTAACCATCTCAAGCCCAATTTACTACTCGTTCTGGTGT  
CTCGTCAGGGCAAGCCTTATTTCACTGAATGAGCAGCTTTGTTACGTTGATTTGGGTAATG  
AATATCCGGTTCTTGTCAAGATTACTCTTGATGAAGGTCAGCCAGCCTATGCGCCTGGTC  
TGTACACCGTTTCTGTCTCTTTCAAAGTTGGTCAGTTTCGGTTCCCTTATGATTGACC  
GTCTGCGCCTCGTTCCGGCTAAGTAACATGGAGCAGGTCGCGGATTTTCGACACAATTTAT  
CAGGCGATGATACAAATCTCCGTTGTACTTTGTTTCGCGCTTGGTATAATCGCTGGGGT  
CAAAGATGAGTGTTTTAGTGTATTCTTTGCTCTTTTCGTTTTAGGTTGGTGCCTTCGTA  
GTGGCATTACGTATTTTACCCGTTTAAATGAAACTTCTCATGAAAAAGTCTTTAGTCCT  
CAAAGCCTCTGTAGCCGTTGCTACCCTCGTTCCGATGCTGTCTTTTCGCTGCTGAGGGTGA  
CGATCCCGCAAAGCGGCCTTTAACTCCCTGCAAGCCTCAGCGACCGAATATATCGGTTA  
TGCCTGGGCGATGGTTGTTGTCAATTGTGCGCGCAACTATCGGTATCAAGCTGTTTAAAGAA  
ATTCACCTCGAAAGCAAGCTGATAAACCGATACAATTAAGGCTCCTTTTGGAGCCTTTT  
TTTTGGAGATTTTCAACGTGAAAAAATTTATTTTCGCAATTCCTTTAGTTGTTTCTTTCT  
ATTCTCACTCCGCTGAAACTGTTGAAAGTTGTTTAGCAAAATCCCATACAGAAAATTCAT  
TTACTAACGTCTGGAAAGACGACAAAACTTTAGATCGTTACGCTAACTATGAGGGCTGTC  
TGTGGAATGCTACAGGCGTTGTAGTTTGTACTGGTGACGAACTCAGTGTACGGTACAT  
GGGTTTCTATTGGGCTTGTATCCCTGAAAATGAGGGTGGTGGCTCTGAGGGTGGCGGTT  
CTGAGGGTGGCGGTTCTGAGGGTGGCGGTAATAAACCTCCTGAGTACGGTGATACACCTA  
TTCCGGGCTATACTTATATCAACCCTCTCGACGGCACTTATCCGCCTGGTACTGAGCAAA  
ACCCCGCTAATCCTAATCCTTCTCTTGAGGAGTCTCAGCCTCTTAATACTTTTATGTTTC  
AGAATAATAGGTTCCGAAATAGGCAGGGGGCATTAAGTGTTTATACGGGCACTGTTACTC  
AAGGCACTGACCCCGTTAAACTTATTACCAGTACACTCCTGTATCATCAAAGCCATGT  
ATGACGCTTACTGGAACGGTAAATTCAGAGACTGCGCTTTCCATTCTGGCTTTAATGAGG  
ATTTATTTGTTTGTGAATATCAAGGCCAATCGTCTGACCTGCCTCAACCTCCTGTCAATG  
CTGGCGGCGGCTCTGGTGGTGGTTCTGGTGGCGGCTCTGAGGGTGGTGGCTCTGAGGGT  
GCGGTTCTGAGGGTGGCGGCTCTGAGGGAGGCGGTTCCGGTGGTGGCTCTGGTTCCGGTG  
ATTTTGTATTATGAAAAGATGGCAAACGCTAATAAGGGGGCTATGACCGAAAATGCCGATG  
AAAACGCGCTACAGTCTGACGCTAAAGGCAAACCTTGATTCTGTCGCTACTGATTACGGTG  
CTGCTATCGATGGTTTTCATTGGTGACGTTTCCGGCCTTGCTAATGGTAATGGTGCTACTG  
GTGATTTTGTCTGGCTCTAATTTCCCAAATGGCTCAAGTCGGTGACGGTGATAATTCACCTT  
TAATGAATAATTTCCGTCAATATTTACCTTCCCTCCCTCAATCGGTTGAATGTCGCCCTT  
TTGTCTTTGGCGCTGGTAAACCATATGAATTTTCTATTGATTGTGACAAAATAAACTTAT  
TCCGTGGTGTCTTTGCGTTTCTTTTATATGTTGCCACCTTTATGTATGATTTTCTACGT  
TTGCTAACATACTGCGTAATAAGGAGTCTAATCATGCCAGTTCTTTTGGGTATTCCGTT  
ATTATTGCGTTTCCCTCGGTTTCTTCTGGTAACTTTGTTTCGGCTATCTGCTTACTTTTCT  
TAAAAAGGGCTTCGGTAAGATAGCTATTGCTATTTTATTGTTTCTTGCTCTTATTATTGG  
GCTTAACTCAATTCCTTGTGGGTTATCTCTCTGATATTAGCGCTCAATTACCCTCTGACTT  
TGTTTCAGGGTGTTCAGTTAATTCCTCCGCTCAATGCGCTTCCCTGTTTTTATGTTATTCT  
CTCTGTAAAGGCTGCTATTTTCATTTTTGTACGTTAAACAAAAAATCGTTTCTTATTTGGA  
TTGGGATAAATAATATGGCTGTTTATTTTGTAACTGGCAAATTAGGCTCTGGAAAGACGC  
TCGTTAGCGTTGGTAAGATTGAGGATAAAATTTGTAGCTGGGTGCAAATAGCAACTAATC  
TTGATTTAAGGCTTCAAACCTCCCGCAAGTCGGGAGGTTTCGCTAAAACGCCTCGCGTTC  
TTAGAATAACCGATAAGCCTTCTATATCTGATTTGCTTGCTATTGGGCGCGGTAATGATT  
CCTACGATGAAAATAAAAACGGCTTGTGTTCTCGATGAGTGCGGTACTTGGTTTAAATA  
CCCGTTCTTGAATGATAAGGAAAGACAGCCGATTATTGATTGGTTTCTACATGCTCGTA  
AATTAGGATGGGATATTATTTTCTTGTTCAGGACTTATCTATTGTTGATAAACAGGCGC  
GTTCTGCATTAGCTGAACATGTTGTTTATTGTTCGTCTGGACAGAATTACTTTACCTT  
TTGTCGGTACTTTATATTCTCTTATTACTGGCTCGAAAATGCCTCTGCCTAAATTACATG

TTGGCGTTGTTAAATATGGCGATTCTCAATTAAGCCCTACTGTTGAGCGTTGGCTTTATA

CTGGTAAGAATTTGTATAACGCATATGATACTAAACAGGCTTTTTCTAGTAATTATGATT  
CCGGTGTATTATTCTTATTTAACGCCTTATTTATCACACGGTCGGTATTTCAAACCATTA  
ATTTAGGTCAGAAGATGAAATTAACATAAATAATTTGAAAAAGTTTTCTCGCGTTCTTT  
GTCTTGCGATTGGATTTGCATCAGCATTTACATATAGTTATATAACCCAACCTAAGCCGG  
AGGTTAAAAAGGTAGTCTCTCAGACCTATGATTTTGATAAATCACTATTGACTCTTCTC  
AGCGTCTTAATCTAAGCTATCGCTATGTTTTCAAGGATTCTAAGGGAAAATTAATTAATA  
GCGACGATTTACAGAAGCAAGGTTATTCACTCACATATATTGATTTATGTACTGTTTCCA  
TTAAAAAAGGTAATTCAAATGAAATTGTTAAATGTAATTAATTTTGTCTTCTGATGTTT  
GTTTCATCATCTTCTTTTGCTCAGGTAATTGAAATGAATAATTCGCCTCTGCGCGATTTT  
GTAACCTGGTATTCAAAGCAATCAGGCGAATCCGTTATTGTTTCTCCCGATGTAAAAGGT  
ACTGTTACTGTATATTCTCTGACGTTAAACCTGAAAATCTACGCAATTTCTTTATTTCT  
GTTTTACGTGCAAATAATTTTGATATGGTAGGTTCTAACCTTCCATTATTGAGAAGTAT  
AATCCAAACAATCAGGATTATATTGATGAATTGCCATCATCTGATAATCAGGAATATGAT  
GATAATTCGGCTCCTTCTGGTGGTTTTCTTTGTTCCGCAAATGATAATGTTACTCAAAC  
TTTAAAAATTAATAACGTTCCGGCAAAGGATTTAATACGAGTTGTCGAATTGTTTGTAAG  
TCTAATACTTCTAAATCCTCAAATGTATTATCTATTGACGGCTCTAATCTATTAGTTGTT  
AGTGCTCCTAAAGATATTTTAGATAACCTTCTCAATTCCTTTCAACTGTTGATTTGCCA  
ACTGACCAGATATTGATTGAGGGTTTGATATTTGAGGTTGAGCAAGGTGATGCTTTAGAT  
TTTTCATTTGCTGCTGGCTCTCAGCGTGGCACTGTTGCAGGCGGTGTTAATACTGACCGC  
CTCACCTCTGTTTTATCTTCTGCTGGTGGTTCTGTTCCGTTATTTTAAATGGCGATGTTTA  
GGGCTATCAGTTCGCGCATTAAAGACTAATAGCCATTCAAAAATATTGTCTGTGCCACGT  
ATTCTTACGCTTTCAGGTCAGAAGGGTCTATCTCTGTTGGCCAGAATGTCCCTTTTATT  
ACTGGTCTGTGACTGGTGAATCTGCCAATGTAATAATCCATTTGAGACGATTGAGCGT  
CAAATGTAGGTATTTCCATGAGCGTTTTTCTGTTGCAATGGCTGGCGGTAATATTGTT  
CTGGATATTACCAGCAAGGCCGATAGTTTGAGTTCTTCTACTCAGGCAAGTGATGTTATT  
ACTAATCAAAGAAGTATTGCTACAACGGTTAATTTGCGTGATGGACAGACTCTTTTACTC  
GGTGGCCTCACTGATTATAAAAAACTTCTCAGGATTCTGGCGTACCGTTCTGTCTAAA  
ATCCCTTTAATCGGCCTCCTGTTTAGCTCCCGCTCTGATTCTAACGAGGAAAGCACGTTA  
TACGTGCTCGTCAAAGCAACCATAGTACGCGCCCTGTAGCGGCGCATTAAAGCGCGGCGGG  
TGTGGTGGTTACGCGCAGCGTGACCGCTACACTTGCCAGCGCCCTAGCGCCCGCTCCTTT  
CGTTTTCTTCCCTTCTTCTCGCCACGTTCCGCGGCTTTCCCGTCAAGCTCTAAATCG  
GGGCTCCCTTTAGGGTCCGATTTAGTGCTTTACGGCACCTCGACCCCAAAAACTTGA  
TTTGGGTGATGGTTCACGTAGTGGGCCATCGCCCTGATAGACGGTTTTTTCGCCCTTTGAC  
GTTGGAGTCCACGTTCTTTAATAGTGGACTCTTGTTCCAACTGGAACAACACTCAACCC  
TATCTCGGGCTATTCTTTGATTTATAAGGGATTTTGCCGATTTGGAACCACCATCAA  
CAGGATTTTCGCCCTGCTGGGGCAAACCAGCGTGACCGCTTGCTGCAACTCTCTCAGGGC  
CAGGCGGTGAAGGGCAATCAGCTGTTGCCCGTCTCACTGGTGAAGGAAAAACCACCTG  
GCGCCCAATACGCAAACCGCCTCTCCCGCGCGTGGCCGATTCAATTAATGCAGCTGGCA  
CGACAGGTTTCCCGACTGGAAAGCGGGCAGTGAGCGCAACGCAATTAATGTGAGTTAGCT  
CACTCATTAGGCACCCAGGCTTTACACTTTATGCTTCCGGCTCGTATGTTGTGTGGAAT  
TGTGAGCGGATAACAATTTCACACAGGAAACAGCTATGACCATGATTACGAATTCGAGCT  
CGGTACCCGGGGATCCTTATACGGGTACTAGCCATGCGTATACGGTCGCTAGCGGACTTG  
CCTCGCTATCAAAGGTCTAGAGTCGACCTGCAGGCATGCAAGCTTGGCACTGGCCGTCTG  
TTTACAACGTCTGACTGGGAAAACCTGGCGTTACCCAATTAATCGCCTTGCAGCACA  
TCCCCCTTTCGCCAGCTGGCGTAATAGCGAAGAGGCCCGCACCGATCGCCCTTCCCAACA  
GTTGCGCAGCCTGAATGGCGAATGGCGCTTTGCCTGGTTTTCCGGCACCAAGCGGTGCC  
GGAAAGCTGGCTGGAGTGCGATCTTCTGAGGCCGATACTGTCTGTCGCTCCCTCAAACCTG  
GCAGATGCACGGTTACGATGCGCCCATCTACACCAACGTGACCTATCCATTACGGTCAA  
TCCGCCGTTTTGTTCCACGGAGAATCCGACGGGTTGTTACTCGCTCACATTTAATGTTGA  
TGAAAGCTGGCTACAGGAAGGCCAGACGCGAATTAATTTTGTGATGGCGTTCCTATTGGTTA  
AAAAATGAGCTGATTTAACAAAAATTTAATGCGAATTTTAAACAAAATATTAACGTTTACA  
ATTTAAATATTTGCTTATAACAATCTTCTGTTTTTGGGGCTTTTCTGATTATCAACCGGG

GTACATATGATTGACATGCTAGTTTTACGATTACCGTTCATCGATTCTCTTGTTTGCTCC  
AGACTCTCAGGCAATGACCTGATAGCCTTTGTAGATCTCTCAAAAATAGCTACCCTCTCC

GGCATTAAATTTATCAGCTAGAACGGTTGAATATCATATTGATGGTGATTTGACTGTCTCC  
GGCCTTTCTCACCTTTTGAATCTTTACCTACACATTACTCAGGCATTGCATTTAAAATA  
TATGAGGGTTCTAAAAATTTTTATCCTTGCGTTGAAATAAAGGCTTCTCCCGCAAAGTA  
TTACAGGGTCATAATGTTTTTGGTACAACCGATTTAGCTTTATGCTCTGAGGCTTTATTG  
CTTAATTTTGCTAATTCTTTGCCTTGCTGTATGATTTATTGGATGTT

#### 4) Deoxyribonucleotide sequences for six-helix bundle DNA nanotube, front monomer

head cap staples

AGGATCCCCGGGTACCGGCTAGTACCCGTATA  
ATATTTTAGTTAATTTTCATCTTCTGACCTAAATTTAATGG  
TTTGAAATACCGACCGTGTGATAAATAAGGCGTTAAATAA

#### 5) Deoxyribonucleotide sequences for six-helix bundle DNA nanotube, front monomer

core staples

AGTAATAAAAGGGACTGTTTCCTGTGTGCCTTTGATAGCGAG  
AAATGGATTATTTAAACATACGAGCCGGACGGCCAGTGCCAA  
AACGCTCATGGAAATAATGAGTGAGCTATGGGTAAACGCCAGG  
AATATCCAGAACAACCCGCTTTCCAGTCCGCCAGCTGGCGAA  
ACTTGCCTGAGTAGTGAATCGGCCAACGAACTGTTGGGAAGG  
ATTAACCGTTGTAGCGCCAGGGTGGTTTGCCGAAACCAGGC  
ATCAGTGAGGCCACCTGATTGCCCTTCAGGAAGATCGCACTC  
AGACAGGAACGGTAGCGGTCCACGCTGGTGCATCTGCCAGTT  
ATCAGAGCGGGAGCGATGGTGGTTCCGAATGGGATAGGTCAC  
GGTTGCTTTGACGAGAATAGCCCGAGATCCCGTCGGATTCTC  
ACACCCGCCGCGCTAAGAGTCCACTATTTGTAGCCAGCTTTC

AGGGCGCTGGCAAGCGAAAAACCGTCTACCAATAGGAACGCC  
GTGGCGAGAAAGGATCACCCAAATCAAGAAAATTCGCATTAA  
GGGAGCCCCGATTCTAAATCGGAACCCTGTATAAGCAAATA  
AAGAACTGGCTCATCGGAACAACATTATTACCCCGGTTGATA  
TAATTTCAACTTTATTTAGGAATACCACATCGATGAACGGTA  
GAGAAACACCAGAAAAAGGAATTACGAGGGCTATCAGGTCAT  
CGTAACAAAGCTGCCTCGTTTACCAGACATTAATGCCGGAGA  
GAGTAATCTTGACATTTTGCAAAAAGAAGCAAATCACCATCAA  
CGGTGTACAGACCATTTAGACTGGATAGTGTAGGTAAAGATT  
TAAGGGAACCGAACATTCATTGAATCCCTTTAGAACCCTCAT  
CTCCATGTTACTTACGAGAATGACCATATTTTGCGGGAGAAG  
TTGTATCATCGCCTATTATAGTCAGAAGAGCTAAATCGGTTG  
CCCAGCGATTATACAGGAAGCCCGAAAGCAAAGAATTAGCAA  
CGAAAGAGGCAAAATTCAAAGCGAACCAAATAGTAGTAGCAT  
GGGTAAAATACGTAATTAGAGAGTACCTTTCATTTGGGGCGC  
TTGAGGACTAAAGATTTTGCGGATGGCTAGATACATTTGCA  
AAAGACAGCATCGGTAGCTCAACATGTTTGATTCCCAATTCT  
TTACCAGCGCCAAATTAGTTTGACCATTTAGAGCTTAATTGC  
AATAAGTTTATTTTTGTTTAGCTATATTTAATTGCTCCTTT  
ATAAAGGTGGCAACGCATCAATTCTACTGACCGGAAGCAAAC  
TCCTTATTACGCAGTCATACAGGCAAGGACTTCAAATATCGC  
CAATAATAACGGAAGCCTCAGAGCATAACAAAGCGGATTGCA  
CAGATAGCCGAACATGACCCTGTAATACAATCAAAAATCAGG  
AGCAATAGCTATCTCAAGGATAAAAAATTCCTCAAATGCTTTA  
AATTGAGTTAAGCCATGCCTGAGTAATGCGTCCAATACTGCG  
AGAGGGTAATTGAGAGGCCGGAGACAGTTTTTTGCCAGAGGGG  
CGCATTAGACGGGAGTTCTAGCTGATAAGACGATAAAAACCA

AATAGCAGCCTTTAGAGAGATCTACAAAGCATAGTAAGAGCA  
ATCCAAATAAGAAAGAGCAAACAAGAGAATTCAACTAATGCA  
AATTTGCCAGTTACATGTCAATCATATGTACAGGTAGAAAGA  
TCCTGAATCTTACCAAAAACAGGAAGATTAAAATCTACGTTA  
AAATCAAGATTAGTGTTAATATTTTGTTTTTTTTGGGGTCGA  
GTTTTAGCGAACCTAGCTCATTTTTTAATCAGGGCGATGGCC  
TCAGATATAGAAGGGCGTCTGGCCTTCCAAAGAACGTGGACT  
TTTTTCATCGTAGGATGAGCGAGTAACAAAGGGTTGAGTGTTG  
AACCAAGTACCGCAGCGGATTGACCGTAAATCGGCAAAATCC  
ATAATCGGCTGTCTGCGCATCGTAACCGTTTGCCCCAGCAGG  
ATAATATCCCATCCCAGTATCGGCCTCACCGCTGGCCCTGA  
CGCGCCTGTTTATCGCACCGCTTCTGGTTTCTTTTCACCAGT  
TCCAGACGACGACACATTCAGGCTGCGCCGCGGGGAGAGGCG  
ATAAGAGAATATAACCTCTTCGCTATTAGGGAAACCTGTCGT  
ACGCCAACATGTAACAAGGCGATTAAGTACTCACATTAATTG  
CGCTCAACAGTAGGGACGTTGTAAAACGAAGCATAAAGTGTA  
GTATCATATGCGTTAGGTCGACTCTAGAAAATTGTTATCCGC  
GAATAAACACCGGAGACCGTATACGCATGAGCTCGAATTCGT  
AACTTTTTCAAATCCTGAAAGCGTAAGGAGATAGAACCCTT  
AAATGCTGATGCAATGGCTATTAGTCTTCCAGTCACACGACC  
CTTTTTAACCTCCGTGCGCATTAAAAATCGCTCAATCGTCTG  
GTCAATAGTGAATTACAGAGGTGAGGCGATTGCAACAGGAAA  
CTTGAAAACATAGCCCACGCTGAGAGCCTCGGCCTTGCTGGT  
CTTCTGTAAATCGTCCTTGCTGAACCTCTTAGTAATAACATC  
GGAAACAGTACATATCAGTTGGCAAATCTGTCCATCACGCAA  
TTAATTACATTTAATCTAAAATATCTTTGAAGTGTTTTTATA  
TGAGCAAAAGAAGACCGTCAATAGATAAATTAAAGGGATTTT

GTTACAAAATCGCGTTTACAAACAATTCCTTTCCTCGTTAGA  
GGAGAAACAATAACACGTTATTAATTTTAGGGCGCGTACTAT  
TTAACGTCAGATGAGGAACAAAGAAACCTGCGCGTAACCACC  
GCACGTAAAACAGATCCTGATTATCAGAAAGGAGCGGGCGCT  
TGAATAATGGAAGGTTGTTTGGATTATAGAAAGCCGGCGAAC  
AGTAACAGTGCCCGGAAAGTATTAAGAGCGTTGGGAAGAAAA  
AGGAGTGACTGGTATTAGCGGGGTTTTCTTATGCGATTTT  
TTTACCGTTCAGTGAGAGGGTTGATATGGCTTGAGATGGTT  
TAAATCCTCATTAAGTACTCAGGAGGTTAGGCTTGCCCTGAC  
TTGAGGCAGGTCAGCTCAGAACCGCCACATTACCCAAATCAA  
ACCAGAACCACCACGATAGCAAGCCCAACTGACCTTCATCAA  
CTCAGAACCGCCACTTCGTCACCAGTACAGAGGACAGATGAA  
ACCAGAGCCACCACACAGCCCTCATAGTCAGACGGTCAATCA  
CTTATTAGCGTTTGTTCAGACGTTAGAAATCCGCGACCTG  
AGACTGTAGCGGTTAAACAACCTTCAAAGTACAACGGAGAT  
ACCGTAATCAGTAGAACAACTAAAGGAAACTCATCTTTGACC  
AGCAAGGCCGAAAAATCTCCAAAAAAGCACCAACCTAAAA  
GGAATTAGAGCCAGCGGTTTATCAGCTTAGTTTCCATTAAAC  
CATTAAGGTGAATTGATACCGATAGTTCGGCTACAGAGGCT  
TGAATATAATGCTGAACGAGGGTAGCAAGCGCCGACAATGAC  
TGATAAGAGGTCATCTTTTTCATGAGGAGCTTTCGAGGTGAA  
TCCAACAGGTCAGGATGCCACTACGAAGAGGCTCCAAAAGGA  
GTTTTAATTCGAGCGAATACTAAACTTGCGAATAATAAT  
TCAAAAAGATTAAGCAAGCGCGAAACAACAGTTTCAGCGGAG  
TCTTTACCCTGACTGATAAATTGTGTCGTAAATGAATTTTCT  
AACAGTTCAGAAAAGCCGGAACGAGGCGTAGCGTAACGATCT  
GAATCGTCATAAATTGACCAACTTTGAAAACTACAACGCCT

GTAATAGTAAAATGGGCGCATAGGCTGGTAGGAACCCATGTA  
AAATAGCGAGAGGCAGAACCGGATATTCCTCAGAGCCACCA  
ACACTATCATAACCTCATTCAGTGAATATAGTACCGCCACCC  
GATACATAACGCCACGAGTAGTAAATTGAAGTATAGCCCGGA  
TTCATCAGTTGAGAATCATTGTGAATTAGCTCAGTACCAGGC  
ATAAAACGAACTAATATAACCAGTCAGGAGCTGAGACTCCTCA  
GGTGCCGTAAAGCATAGAGCTTGACGGGCTTTTCGGAACCTA  
CACTACGTGAACCAAGGGAAGAAAGCGATGATGGCAATTCAT  
CCAACGTCAAAGGGTGTAGCGGTCACGCACCAGAAGGAGCGG  
TTCCAGTTTGGAECTAATGCGCCGCTACAAAAGTTTGAGTAA  
CTTATAAATCAAAGCACGTATAACGTGGACAACCTCGTATTA  
CGAAAATCCTGTTTTAAACAGGAGCCGTACATTTGAGGATT  
GAGAGTTGCAGCAACGCCAGAATCCTGAAGGAGCACTAACAA  
GAGACGGGCAACAGCGAGTAAAAGAGTCAACAGTTGAAAGGA  
GTTTGCGTATTGGGCAATACTTCTTTGAAAATATCAAACCCT  
GCCAGCTGCATTAAGAAGACTCAAACCTAAGCAGCAAATGAAA  
CGTTGCGCTCACTGTATTACCGCCAGCCGTGAGTATTAACAC  
AAGCCTGGGGTGCCTACCTACATTTTGAACCGAACGAACCAC  
TCACAATTCACACCATTGGCAGATTCATAATGCGCGAACTG  
AATCATGGTCATAGCATTCTGGCCAACAAATACGTGGCACAG  
GCAAGTCCGCTAGCATCATAATTACTAGCAAAGAACGCGAGA  
GCTTGCATGCCTGCATACAAATTCTTACATATAACTATATGT  
GTTTTCCAGTCACGCTTAATTGAGAATGTCTGAGAGACTAC  
AGGGGGATGTGCTGTTTAGGCAGAGGCAAGACGCTGAGAAGA  
GCGATCGGTGCGGGAGTACCGACAAAAGTTTCCCTTAGAATC  
AAAGCGCCATTCGCATAAACACATGTTAGTGAATAACCTTG  
CAGCCAGCTTTCCGAACAATAGATAAGTTTACCTTTTTTAAT



TGAGGGGACGACGATAATTTACGAGCATTCAAGAAAACAAA  
GTTGGTGTAGATGGTTCCTTATCATTCTCATTTC AATTACC  
CGTGGGAACAAACGCTCATCGAGAACAAGCTTTGAATACCAA  
ATCAACATTA AATGATCATTACCGCGCCTACCTTTTACATCG  
ATCAAAAATAATTCCTTATCCGGTATTCGTAGATTTTCAGGT  
ATTTTTGT TAAATCCCCGACTTGCGGGATATCAAAATTATTT  
TTTAAATTGTAAACTGCTATTTTGCACCGCCCCCTGCCTATC  
ATCAGAAAAGCCCCAACGCTAACGAGCGGGGTCAGTGCCTTG  
ATCGTAAA ACTAGCAAAATAAACAGCCAGCTTTTGATGATAC  
TGCCTGAGAGTCTGCGATTTTTTTGTTTAGCGCAGTCTCTGAA  
GGGTAGCTATTTTTTCAGAGAGAATAACATATTCACAAACAAA  
TATGATATTC AACCGAATTA ACTGAACAGCATTGACAGGAGG  
CAAAAGGGTGAGAACGCTAATATCAGAGCCCTCAGAGCCGCC  
ATATTTTAAATGCACAATAATAAGAGCATCAGAGCCGCCACC  
CCTTTATTTCAACGTACCGAAGCCCTTTTCAA AATCACCGGA  
TACCAAAAACATTA AAGTTACCAGAAGGTCGGTCATAGCCCC  
AATTAAGCAATAAATACCCAAAAGAACTTTGCCTTTAGCGTC  
TAACATCCAATAAATATGTTAGCAAACGCCATCGATAGCAGC  
GAGCTGAAAAGGTGATATAAAAGAAACGGCACCATTACCATT  
AATGGTCAATAACCGTCACAATCAATAGACTTGAGCCATTTG  
GCGAACGAGTAGATGACAAAAGGGCGACTGACGGAAATTATT  
AACAAACCATCGCCGGGAAGGTAAATATATTCAACCGATTGA  
TTTCTTAAACAGCTTATCACCGTCACCGAAAATTCATATGGT  
GCCTTTAATTGTATCAAAATCACCGTACAAAGACACCACGG  
TTTTTACGTTGAACGTCACCAATGAAATAGAAAATACATAC  
TGAGAATAGAAAGGCGACAGAATCAAGTGGCATGATTAAGAC  
GTATGGGATTTTGCTTTCATCGGCATTTAAACCGAGGAAACG

AAAGTTTTGTCGTCCCATCTTTTCATAATTAAGAAAAGTAAG  
GTAGCATTCACAGCGGAACCGCCTCCAGAAACAATGAAAT  
CCGTAACACTGAGTCCTCAGAGCCACCAAGATAACCCACAAG  
CCCTCATTTTTAGGCAGAGCCGCCGCCACCCTGAACAAAGTC  
TCAGAACCGCCACCACGATTGGCCTTGATAAAAAACAGGGAAG  
ATAGGTGTATCACCAGCCAGAATGGAAAACGTCAAAAATGAA  
GGATAAGTGCCGTCAAGCGTCATACATGTATTATTTATCCCA  
AGAGAAGGATTAGGAATAAGTTTTAACGTCTTTCCAGAGCCT  
TTATTCTGAAACATTATAAACAGTTAATCAGCTACAATTTTA  
CAATATAATCCTGAGTTAGAACCTACCAGGTTTTGAAGCCTT  
AATTATCATCATATAATAAAGAAATTGCTAAGAACGCGAGGC  
CATTATCATTTTTGCATATACAGTAACAGCAATAGCAAGCAA  
AATCCTTTGCCCGAGGATTCGCCTGATTGCAAGCCGTTTTTA  
TAGAAGTATTAGACCAGAGGCGAATTATAAGAACGGGTATTA  
CTAATAGATTAGAGTGATGAAACAAACAGTAGAAACCAATCA  
ATTGAGGAAGGTTACAATTTCAATTTGAACCTGAACAAGAAAA  
CAATCAATATCTGGAATCAATATATGTGCAGCTAATGCAGAA  
AATCTAAAGCATCACGCTATTAATTAATGTAAAGTAATTCTG  
CGCCTGCAACAGTGGATAGCTTAGATTATTTTCGAGCCAGTA  
CAGCAGAAGATAAATATCAAAATCATAGCGCCATATTTAACA  
ATAGCCCTAAAACAGCTTAGGTTGGGTTTCAGTATAAAGCCAA  
ACAATATTTTTGAAATCCAATCGCAAGAAAAAAGCCTGTTTA

6) Deoxyribonucleotide sequences for six-helix bundle DNA nanotube, front monomer  
tail connector staples

GGATGTAAATGCTGTTCCATATAACAGTTTAAATATGCAACT  
TTATATAACTATGAACGCATAACCGATACACCCTCAGCAGCG  
AAAGTACGGTGTACTTTTGCGGGATCGTTATTCGGTCGCTGA

7) Deoxyribonucleotide sequences for six-helix bundle DNA nanotube, rear monomer  
head connector staples

CGCTGGAAGTTTCAATGCAAATCCAATCCGGCTTAGGTTGGG  
GGCTTGCAGGGACGACCTTTTAAACCTCGCAAGACAAAGAAC  
GAGTTAAAGGCCGCGGCCAGTGCCAAGCACGACGTTGTAAAA

8) Deoxyribonucleotide sequences for six-helix bundle DNA nanotube, rear monomer  
core staples

CCATTGCAACAGGATTTGATAGCGAGGCTGCAAGGCGATTAA  
TATCGGCCTTGCTGCTAGTACCCGTATAGGCCTCTTCGCTAT  
GATTAGTAATAACAGTAATCATGGTCATGCCATTCAGGCTGC  
TCTGTCCATCACGCGCTCACAAATCCACCGGCACCGCTTCTG  
GAGAAGTGTTTTTATAAAGCCTGGGGTGGACAGTATCGGCCT  
CGATTAAAGGGATTTGCGTTGCGCTCACGGGCGCATCGTAAC  
TGCTTTCCTCGTTAGTGCCAGCTGCATTCGGCGGATTGACCG  
ACAGGGCGCGTACTCGGTTTTCGTATTGTGTGAGCGAGTAAC  
GCTGCGCGTAACCAGTGAGACGGGCAACTCGCGTCTGGCCTT  
GAAAGGAGCGGGCGGAGAGAGTTGCAGCTCAGCTCATTTTTT  
GGGAAAGCCGGCGAGGCGAAAATCCTGTACGTTAATATTTTG  
AAATCGGAACCCTACCCTTATAAATCAACCAAAAACAGGAAG

ACCCAAATCAAGTTTGTTCAGTTTGGAGCATGTCAATCATA  
AAAAACCGTCTATCCTCCAACGTCAAAGTGGAGCAAACAAGA  
TAAGGCTTGCCCTGACTTTAATCATTGTTTGAGAGATCTACA  
TCATTACCCAAATCGCTCATTATACCAGCCGTTCTAGCTGAT  
GGCTGACCTTCATCTAATAAAACGAACTAAAGGCCGGAGACA  
AAAGAGGACAGATGGATTCATCAGTTGACAATGCCTGAGTAA  
CGCAGACGGTCAATCAGATACATAACGCCGCAAGGATAAAAA  
CGAAATCCGCGACCCAACACTATCATAATATGACCCTGTAAT  
AAAGTACAACGGAGCAAATAGCGAGAGAAGCCTCAGAGCAT  
ACACTCATCTTTGAGGGTAATAGTAAAAAATCATACAGGCAA  
AGGCACCAACCTAACGGAATCGTCATAATGGCATCAATTCTA  
GAAGTTTCCATTAATAAACAGTTCAGAACCTGTTTAGCTATA  
AACGGCTACAGAGGGGTCTTTACCCTGAATTTAGTTTGACCA  
GTCACCCTCAGCAGCATCAAAAAGATTACATTCCATATAACA  
CGCTGAGGCTTGCAGCGTTTTAATTCGACATGTTTTAAATAT  
AATGACAACAACCAACTCCAACAGGTCAATGGCTTAGAGCTT  
CGTAGAAAATACATATGCTGTAGCTCAAGCTTCAAAGCGAAC  
CTGGCATGATTAAGGTGTCTGGAAGTTTAGAGGAAGCCCGAA  
GGAAACCGAGGAAACTGCGAACGAGTAGCTATTATAGTCAGA  
TTTTAAGAAAAGTACAAATGGTCAATAAAACGAGAATGACCA  
CAAGAAACAATGAAGCGAGCTGAAAAGGATATTCATTGAATC  
AGAGATAACCCACAATTAACATCCAATATGTTTAGACTGGAT  
CACCTGAACAAAGAAAATTAAGCAATAGCTTTTGCAAAGA  
CATAAAACAGGGATGTACCAAAAACATCCCTCGTTTACCAG  
TAACGTCAAAAATGAGCCTTTATTTCAACAAAAGGAATTACG  
CATATTATTTATCCATATATTTTAAATGGATTTAGGAATACC  
CGTCTTTCAGAGCTTCAAAGGGTGAGAACGGAACAACATT

CCCAGCTACAATTTAATATGATATTCAATCAGGACGTTGGGA  
GAGGTTTTGAAGCCGAGGGTAGCTATTTGAATTACCTTATGC  
TCTAAGAACGCGAGATTGCCTGAGAGTCGGATTGGGCTTGAG  
CCCAATAGCAAGCATAATCGTAAAATAACAAGAGTCCACTA  
AAGCAAGCCGTTTTTAATCAGAAAAGCCAAGAATAGCCCGAG  
CCAAGAACGGGTATTATTTAAATTGTAATTGATGGTGGTTCC  
ATGTAGAAACCAATAAATTTTTGTTAAAAAGCGGTCCACGCT  
GTCCTGAACAAGAACCATCAAAAATAATAGCTGATTGCCCTT  
TTCAGCTAATGCAGTCATCAACATTAAAGGCGCCAGGGTGGT  
AGGTAAAGTAATTCTCCGTGGGAACAAAAATGAATCGGCCAA  
CATTTTCGAGCCAGACGTTGGTGTAGATTGCCCGCTTCCAG  
ATCGCCATATTTAATTTGAGGGGACGACCCTAATGAGTGAGC  
ACCAGTATAAAGCCTCCAGCCAGCTTTCACAACATACGAGCC  
AGAAAAAGCCTGTTGCAAAGCGCCATTCAGCTGTTTCCTGTG  
ATAAGGCGTTAAATGGGCGATCGGTGCGAGGATCCCCGGGTA  
CTGACCTAAATTTAAAAGGGGGATGTGCAAGTCCGCTAGCGA  
GCGAGAAAACTTTTGGGTTTTCCAGTCTTGCATGCCTGCAG  
AGGTCTGAGAGACTCTCAATCGTCTGAAAATACCTACATTTT  
TAAGACGCTGAGAAAGTCACACGACCAGAATATTACCGCCAG  
ATTTTCCCTTAGAAGATAGAACCCTTCTAGAAGAACTCAAAC  
TGAGTGAATAACCTAGACAATATTTTTGAGCAATACTTCTTT  
AATTACCTTTTTTATGATAGCCCTAAAAACCGAGTAAAAGAG  
CATCAAGAAAACAAACCAGCAGAAGATATACGCCAGAATCCT  
ATTCATTTCAATTAACCGCCTGCAACAGGCTAAACAGGAGGC  
TTGCTTTGAATACCAAAATCTAAAGCATGAGCACGTATAACG  
AGTACCTTTTACATCTCAATCAATATCTCTTAATGCGCCGCT  
GCGTAGATTTTCAGGAATTGAGGAAGGTAGTGTAGCGGTCAC

CATATCAAATTATAACTAATAGATTAGGAAGGGAAGAAAGC  
GTTTGATTATACTTTTAGAAGTATTAGTTTAGAGCTTGACG  
CTGATTATCAGATGTAAATCCTTTGCCCTGCCGTAAAGCACT  
AACAAAGAAACCACAACATTATCATTTTCTACGTGAACCATC  
AAGCGCAGTCTCTGACTGGTAATAAGTTAACGAGTAGTAACG  
GATATTCACAAACATGCCCGTATAAACAGCTCATTAGTGAA  
CAGCATTGACAGGATATTATTCTGAAACCAAGAACCGGATAT  
CACCTCAGAGCCGCAAGAGAAGGATTACAGGCGCATAGGCT  
CCTCAGAGCCGCCAGCGGATAAGTGCCGACTGACCAACTTTG  
AATCAAATCACCGGAATAGGTGTATCATAGCCGGAACGAGG  
TTTCGGTCATAGCCCCTCAGAACCGCCACTGATAAATTGTGT  
GTTTGCTTTAGCGCACCTCATTTTCAACCAAGCGCGAAAC  
AACCATCGATAGCATAACGTAACACTGAAAGAATACACTAAA  
TAGCACCATTACCACTGTAGCATTCCACTAATGCCACTACGA  
CGACTTGAGCCATTCTAAAGTTTTGTGCGACTTTTTTCATGAG  
ATTGACGGAAATTACTGTATGGGATTTTGGAACGAGGGTAGC  
CAAAGGGCGACATAGTGAGAATAGAAAGCTTTTGCGGGATC  
CACAATCAATAGAAATTTTTTTCACGTTGCCGATATATTCGGT  
CAGACCGGAAGCAATCGCCACGCATAAAAAATCTCCAAAAA  
AGACTTCAAATATCGGGAGTTAAAGGCCGGAACAACCTAAAGG  
AGCAAAGCGGATTGCGAAAGACAGCATCGCTAAACAACCTTTC  
TAAATCAAAAATCACTTTGAGGACTAAATCTTTCAGACGTT  
CCCCTCAAATGCTTACGGGTAAAATACGAGACAGCCCTCATA  
AGCGTCCAATACTGAACGAAAGAGGCAAGTTTCGTCACCAGT  
AGTTTTGCCAGAGGCCCCAGCGATTATGGGATAGCAAGCCC  
ACGACGATAAAAAACATTTGTATCATCGCCCCTCAGAACCGCC  
AGGCATAGTAAGAGTGCTCCATGTTACTCCGTAICTCAGGAGG

ACATTCAACTAATGCATAAGGGAACCGATCGAGAGGGTTGAT  
ATTACAGGTAGAAAAACGGTGTACAGACGGATTAGCGGGGTT  
AGAAAAATCTACGTAAGAGTAATCTTGAATGAAAGTATTAAG  
GATTTTAAGAACTGAACGTAACAAAGCTGTTAATGCCCCCTG  
ATGGTTTAATTTCAACGAGAAACACCAGTTAACGGGGTCAGT  
TTAAGAACGTGGAAGGGCGATGGCCAGCCATGGCTTTTGA  
ATAGGGTTGAGTGTTTTTGGGGTCGAGGGAACGTTATTAATT  
GAAATCGGCAAAATAAGGGAGCCCCGAACTTTACAAACAAT  
GGTTTGCCCCAGCAACGTGGCGAGAAAGAGCCGTCAATAGAT  
CACCGCCTGGCCCTCTAGGGCGCTGGCATATCTAAAATATCT  
TTTTCTTTTCACCACCACACCCGCCGCGGGTCAGTTGGCAA  
CGCGCGGGGAGAGGATGGTTGCTTTGACCACCTTGCTGAACC  
TCGGGAAACCTGTCGAATCAGAGCGGGATGCCACGCTGAGAG  
TAACTCACATTAATTTAGACAGGAACGGAAACAGAGGTGAGG  
GGAAGCATAAAGTGTAATCAGTGAGGCCCATCGCCATTAAAA  
TGAAATTGTTATCCAAATTAACCGTTGTAATGGCTATTAGTC  
CCGAGCTCGAATTCTCACTTGCTGAGTGACCTGAAAGCGTA  
CCGTATACGCATGGGTAATATCCAGAACTAATAAAAGGGACA  
GTCGACTCTAGACCAAACGCTCATGGAATGGATTATTTACA  
GTTGGGTAACGCCATCAAATATATTTTATTTATCAAATCAT  
TACGCCAGCTGGCGATGGTTTGAATAACGCGATAGCTTAGAT  
GCAACTGTTGGGAAAAGAATAAACACCGGTCGCTATTAATTA  
GTGCCGAAACCAGTAGTATCATATGCGTAAATCAATATATG  
CAGGAAGATCGCACACGCTCAACAGTAAACAATTTCAATTTG  
CGTGCATCTGCCAGCAACGCCAACATGTGATGATGAAACAAA  
TAATGGGATAGGTCTAATAAGAGAATATCGCAGAGGCGAATT  
AACCCGTCGGATTCTGTCCAGACGACGAACGGATTGCGCTGA

CCTGTAGCCAGCTTAACGCGCCTGTTTAGAATATACAGTAAC  
AACCAATAGGAACGAAATAATATCCCATGAAATAAAGAAATT  
TTAAAATTCGCATTCAATAATCGGCTGTGGGTAGAACCTAC  
ATTGTATAAGCAAATAAACCAAGTACCGATATAATCCTGATT  
TGTACCCCGGTTGATATTTTCATCGTAGTTATCATCATATTC  
GAATCGATGAACGGAATCAGATATAGAAGTAAGCGTCATAGG  
AAGGCTATCAGGTCGCGTTTTAGCGAACAAAGCCAGAATGGA  
AAATTAATGCCGGATTAAATCAAGATTAAGACGATTGGCCTT  
GTCAAATCACCATCTATCCTGAATCTTAACCAGAGCCGCCGC  
TGTGTAGGTAAAGACTAATTTGCCAGTTACCCTCAGAGCCAC  
TTTTTAGAACCCCTCCAATCCAAATAAGAACCGGAACCGCCTC  
ACTTTTGCGGGAGAAAAATAGCAGCCTTTGCCATCTTTTCAT  
AAAGCTAAATCGGTAGCGCATTAGACGGGTTTTTCATCGGCAT  
GGCAAAGAATTAGCTCAGAGGGTAATTGAGCGACAGAATCAA  
CTAATAGTAGTAGCAGAATTGAGTTAAGAACGTCACCAATGA  
TTTTCATTTGGGGCATAGCAATAGCTATAGCAAATCACCAG  
TTAGATACATTTTCGAGCAGATAGCCGAAATTATCACCGTCAC  
GTTGATTCCCAATTCGCAATAATAACGGGAGGGAAGGTAAAT  
GCAACTAAAGTACGACTCCTTATTACGCACCAGCGCCAAAGA  
AATTGCTGAATATAACATAAAGGTGGCATAAGTTTATTTTGT  
AAAGGCTCCAAAAGAAGACACCACGGAAACATATAAAAGAAA  
AATTGCGAATAATAAATTCATATGGTTTAGTATGTTAGCAA  
AACAGTTTCAGCGGTCAACCGATTGAGGAATACCCAAAAGAA  
AGTAAATGAATTTTTTTCATTAAAGGTGACAAAGTTACCAGAA  
GTTAGCGTAACGATTGGGAATTAGAGCCCTTACCGAAGCCCT  
ACAACTACAACGCTTAGCAAGGCCGGACCCAATAATAAGAG  
AATAGGAACCCATGGCACCGTAATCAGTAGCGCTAATATCAG



ACCCTCAGAGCCACTCAGACTGTAGCGCGAGAATTAAGTAA  
TTTAGTACCGCCACCCCTTATTAGCGTTTACAGAGAGAATAA  
ATAAGTATAGCCCGGAACCAGAGCCACCAACGATTTTTTGT  
TTGCTCAGTACCAGCCCTCAGAACCGCCACAAAATAAACAGC  
AGGCTGAGACTCCTCCACCAGAACCACCCCAACGCTAACGAG  
CCTATTTTCGGAACCGGTTGAGGCAGGTCGTTGCTATTTTGCA  
GCCTTGAGTAACAGAATAAATCCTCATTCTCCCGACTTGCGG  
TGATACAGGAGTGTAATTTACCGTTCCAGGCTTATCCGGTAT  
TTAAAAGTTTGAGTCAGAAGGAGCGGAAGAATCATTACCGCG  
TCGACAACTCGTATATGGCAATTCATCACACTCATCGAGAAC  
AATACATTTGAGGATCTGAATAATGGAACTTTCCTTATCATT  
TTAGGAGCACTAACTTGCACGTAAAACACCTAATTTACGAGC  
TCAACAGTTGAAAGGTTTAAACGTCAGATTCAACAATAGATAA  
TCAAATATCAAACCCGGGAGAAACAATAACAATAAACATG  
CCAGCAGCAAATGAAAGTTACAAAATCGAAAGTACCGACAAA  
CGGTCAGTATTAACCCTGAGCAAAAAGAAAATTTAGGCAGAGG  
ATACCGAACGAACCAATTAATTACATTTGGGCTTAATTGAGA  
TTTAATGCGCGAACATGGAAACAGTACATTATACAAATTCTT  
AGAATACGTGGCACTGCTTCTGTAAATCGAATCATAATTA  
TTCTGGCCAACAGATCCTTGAAAACATACGACCGTGTGATAA  
TTGGCAGATTCACCGAGTCAATAGTGAAGTTAATTTTCATCTT

9) Deoxyribonucleotide sequences for six-helix bundle DNA nanotube, rear monomer tail cap staples

CTTTTGATAAGAGGTCATTTTTCGG

GGATTAGAGAGTACCTTTAATTGCTC

TGAATTTCTTAAACAGCTTGATACCGATAGTTGCGCCGAC

GAGCCTTTAATTGTATCGGTTTATCAGCTTGCTTTCGAGG
