# Supplementary material
Source: PubMed Central journal article supplement (PMC1871839)

**a**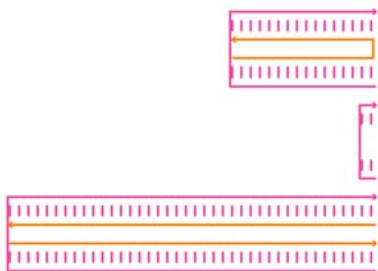**b**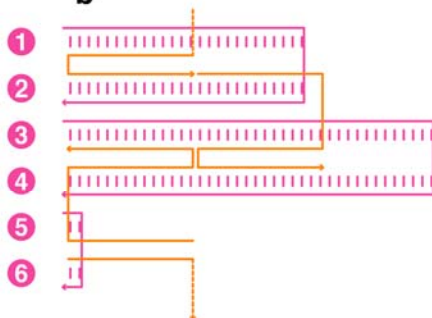**c**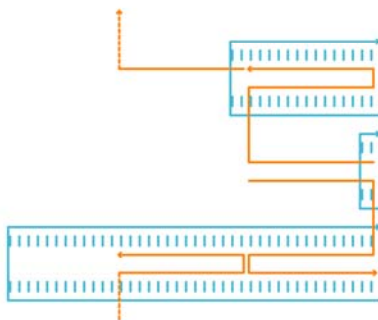**d**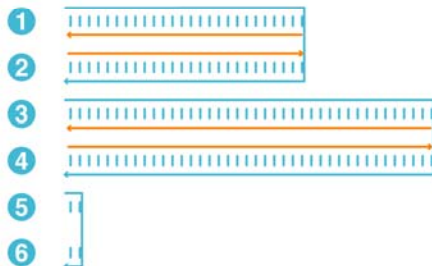**e**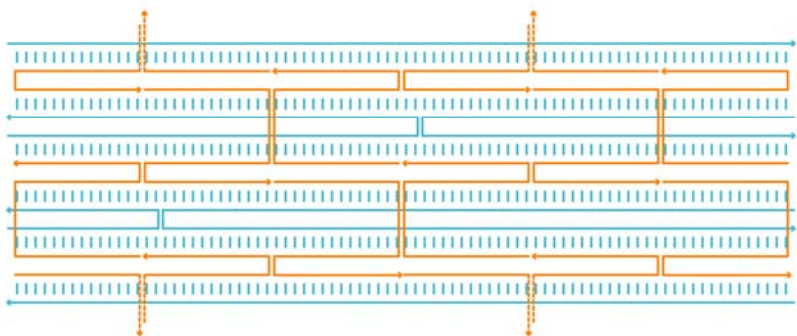

Supplement: pnas_0700930104_1.pdf [file pnas_0700930104_1.pdf]

**a**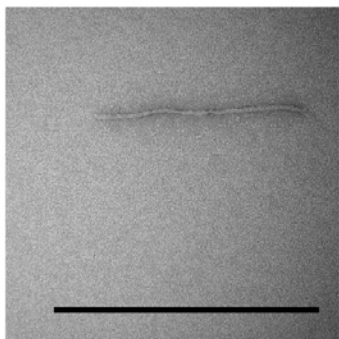**b**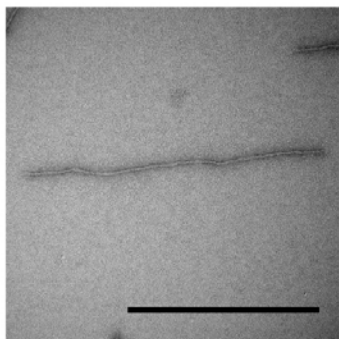**c**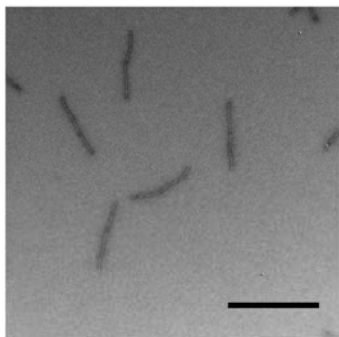**d**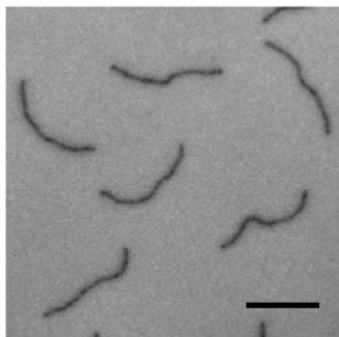**e**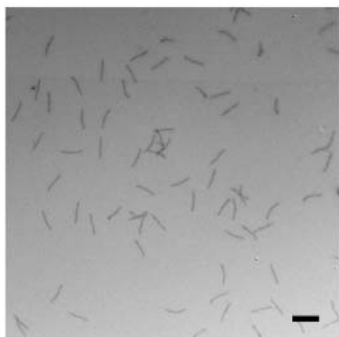**f**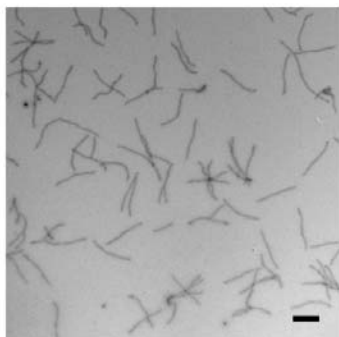

Supplement: pnas_0700930104_2.pdf [file pnas_0700930104_2.pdf]
